# Supplementary material for: A systematic review on the metabolic effects of chlorpyrifos
Source: publisher site journal article supplement (doi:10.1515/reveh-2020-0150), 2021-05-07
Supplement: Supplementary file 1 [file j_reveh-2020-0150_suppl_001.docx]

(((((((Body Weights[Title/Abstract]) OR (Weight, Body[Title/Abstract])) OR (Weights, Body[Title/Abstract])) OR (Body Weight[Title/Abstract])) OR ((((((((((((((((((((((((((((lipid profile[Title/Abstract]) OR (Lipids[Title/Abstract])) OR (Lipid[Title/Abstract])) OR (fat*[Title/Abstract])) OR (hypolipidemic agents[Title/Abstract])) OR (hyperlipidemias[Title/Abstract])) OR (lipid metabolism disorders[Title/Abstract])) OR (lipid metabolism[Title/Abstract])) OR (cholesterol[Title/Abstract])) OR (hypercholesterolemi*[Title/Abstract])) OR (hypocholesterolemi*[Title/Abstract])) OR (low-density lipoprotein[Title/Abstract])) OR (high-density lipoprotein[Title/Abstract])) OR (triglycerides[Title/Abstract])) OR (hypertriglyceridemi*[Title/Abstract])) OR (hypotriglyceridemi*[Title/Abstract])) OR (lipoproteins, hdl[Title/Abstract])) OR (lipoproteins, ldl[Title/Abstract])) OR (lipoproteins, vldl[Title/Abstract])) OR (very-low-density lipoproteins[Title/Abstract])) OR (ldl[Title/Abstract])) OR (hdl[Title/Abstract])) OR (vldl[Title/Abstract])) OR (tg[Title/Abstract])) OR (hyperlipidemi*[Title/Abstract])) OR (hypolipidemi*[Title/Abstract])) OR (dislipidemi*[Title/Abstract])) OR (hypolipoproteinemi*[Title/Abstract]))) OR ((((((((((((((((((((((((((((Blood Sugar[Title/Abstract]) OR (Sugar, Blood[Title/Abstract])) OR (Glucose, Blood[Title/Abstract])) OR (Blood Glucose[Title/Abstract])) OR (Diabetes Mellitus[Title/Abstract])) OR (Diabetes Insipidus[Title/Abstract])) OR (Glycation End Products, Advanced[Title/Abstract])) OR (Glucose Intolerance[Title/Abstract])) OR (Diabetes Mellitus, Type 1[Title/Abstract])) OR (Diabetes Mellitus, Type 2[Title/Abstract])) OR (Diabetes Mellitus, Lipoatrophic[Title/Abstract])) OR (Diabetes, Gestational[Title/Abstract])) OR (Diabetic Ketoacidosis[Title/Abstract])) OR (Latent Autoimmune Diabetes in Adults[Title/Abstract])) OR (Diabete*[Title/Abstract])) OR (Glycem*[Title/Abstract])) OR (Insulin[Title/Abstract])) OR (Insulin, Regular[Title/Abstract])) OR (Regular Insulin[Title/Abstract])) OR (Soluble Insulin[Title/Abstract])) OR (Insulin, Soluble[Title/Abstract])) OR (Insulin A Chain[Title/Abstract])) OR (Sodium Insulin[Title/Abstract])) OR (Insulin, Sodium[Title/Abstract])) OR (Novolin[Title/Abstract])) OR (Iletin[Title/Abstract])) OR (Insulin B Chain[Title/Abstract])) OR (Chain, Insulin B[Title/Abstract]))) AND (((Chlorpyrifos[Title/Abstract]) OR (Lorsban[Title/Abstract])) OR (Dursban[Title/Abstract]))) AND (((Animal[Title/Abstract]) NOT (human[Title/Abstract])) OR (((((((((((((((((Animals[Title/Abstract]) OR (Animal[Title/Abstract])) OR (Fishes[Title/Abstract])) OR (Rodentia[Title/Abstract])) OR (Rodentias[Title/Abstract])) OR (Rodents[Title/Abstract])) OR (Rodent[Title/Abstract])) OR (Capybaras[Title/Abstract])) OR (Capybara[Title/Abstract])) OR (Hydrochaeris[Title/Abstract])) OR (Hydrochaeri[Title/Abstract])) OR (Jerboas[Title/Abstract])) OR (Jerboa[Title/Abstract])) OR (Dipodidae[Title/Abstract])) OR (Castor Beaver[Title/Abstract])) OR (Beavers[Title/Abstract])) OR (Beaver[Title/Abstract])))
